# Supplementary material
Source: PubMed Central journal article supplement (PMC2920209)
Supplement: NIHMS223172-supplement-1.pdf [file NIHMS223172-supplement-1.pdf]

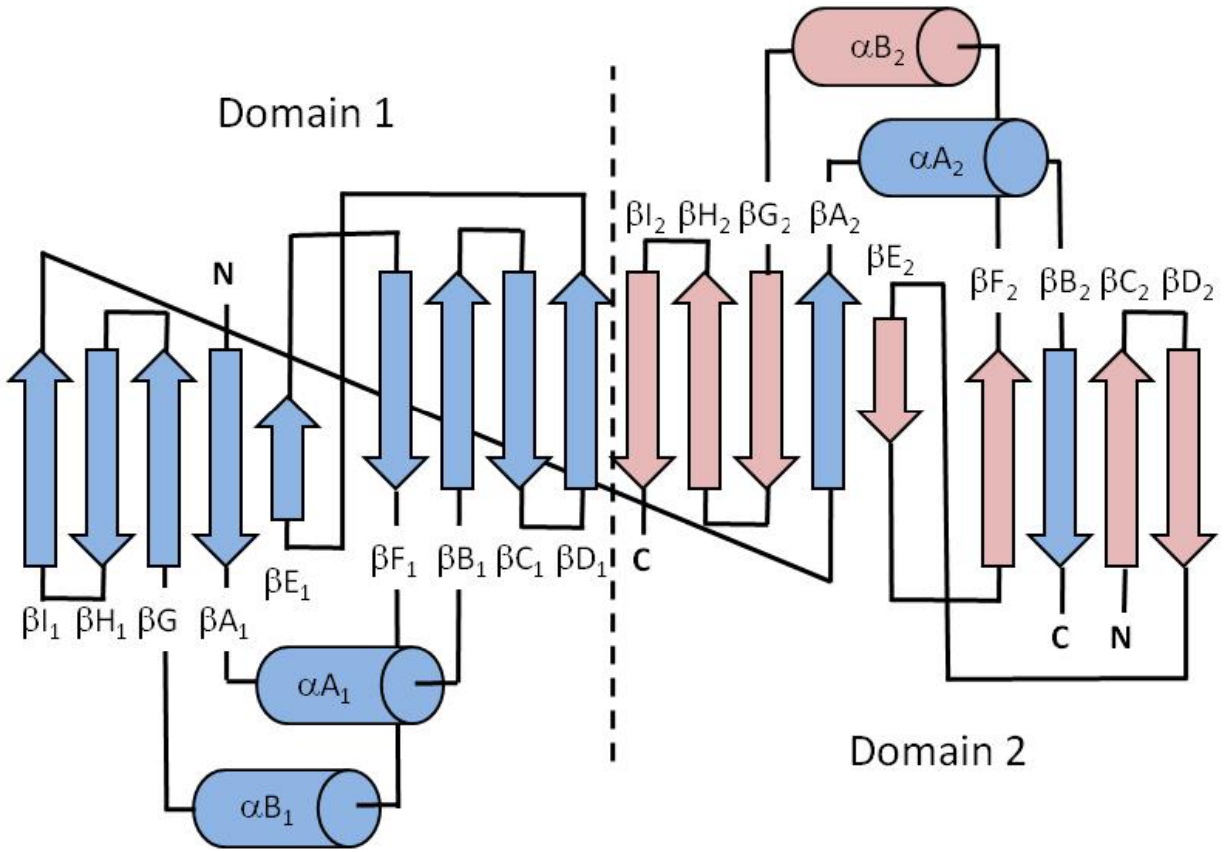

Diagram of the protein topology of split PCNA

- Supplementary Figure 1-

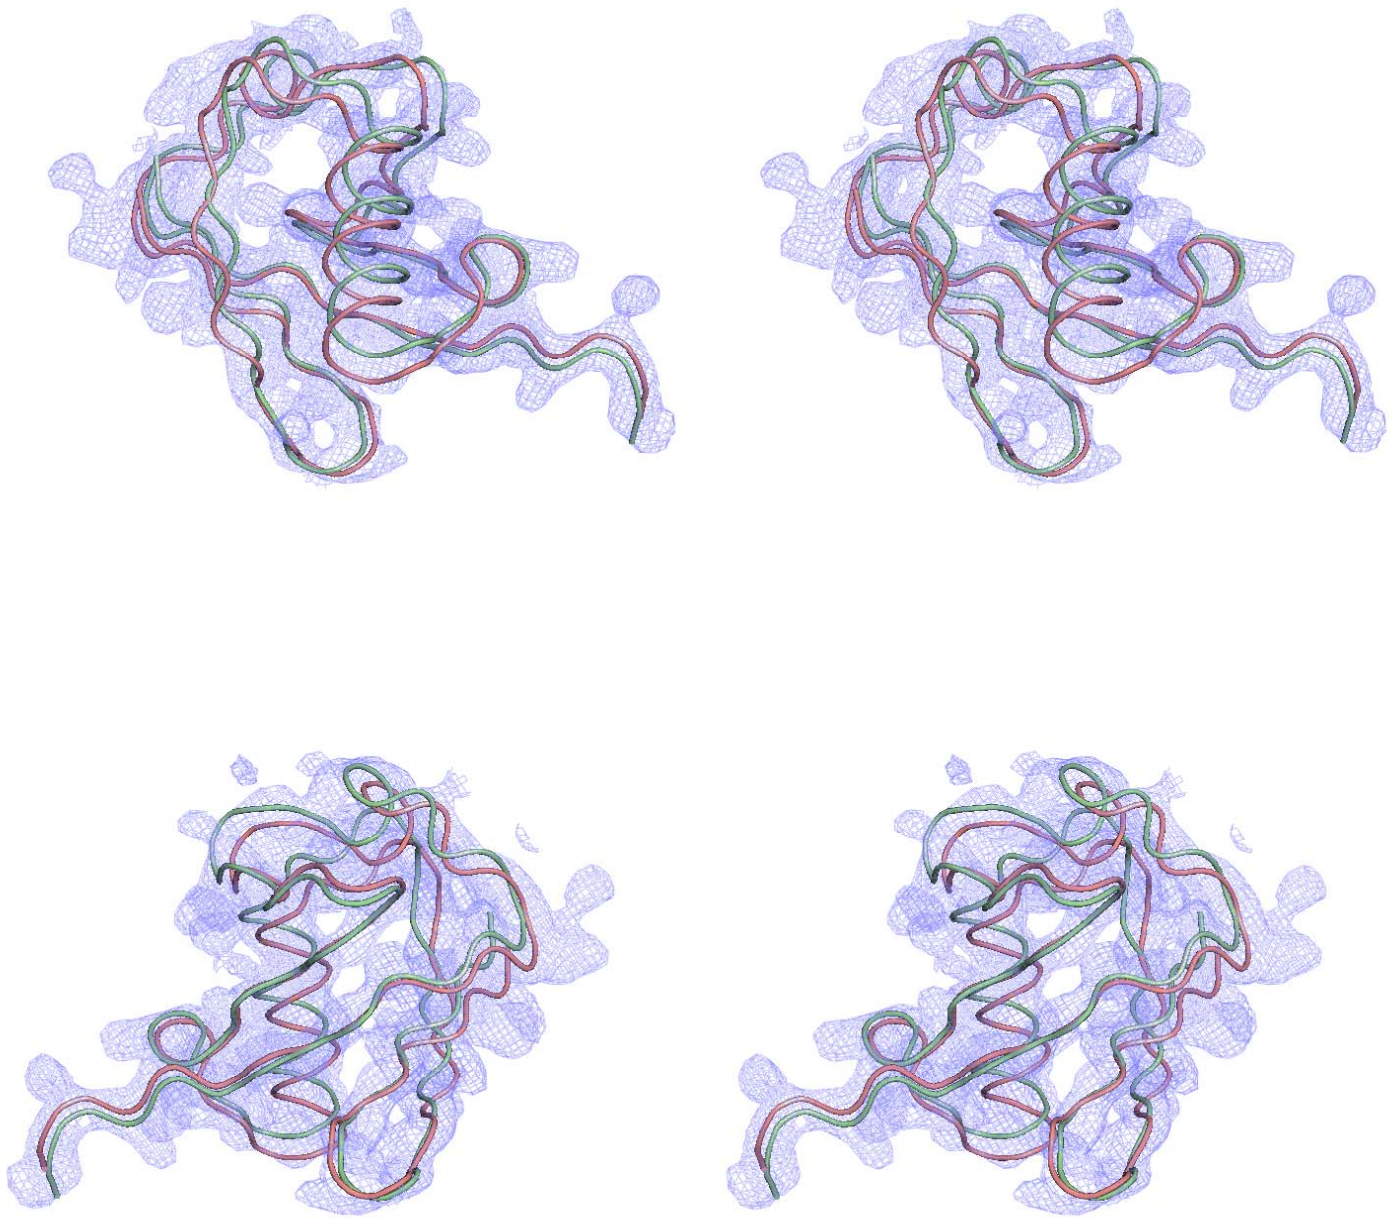

Stereo images of the electron density (level=1.2) of the ubiquitin moiety. The backbone of ubiquitin in position 1 is shown in red, and the backbone of ubiquitin in position 2 is shown in green. The bottom set of stereo images is rotated 180° relative to the top set of stereo images.

- Supplementary Figure 2 -

Ubiquitin in position 1

Ubiquitin in position 2

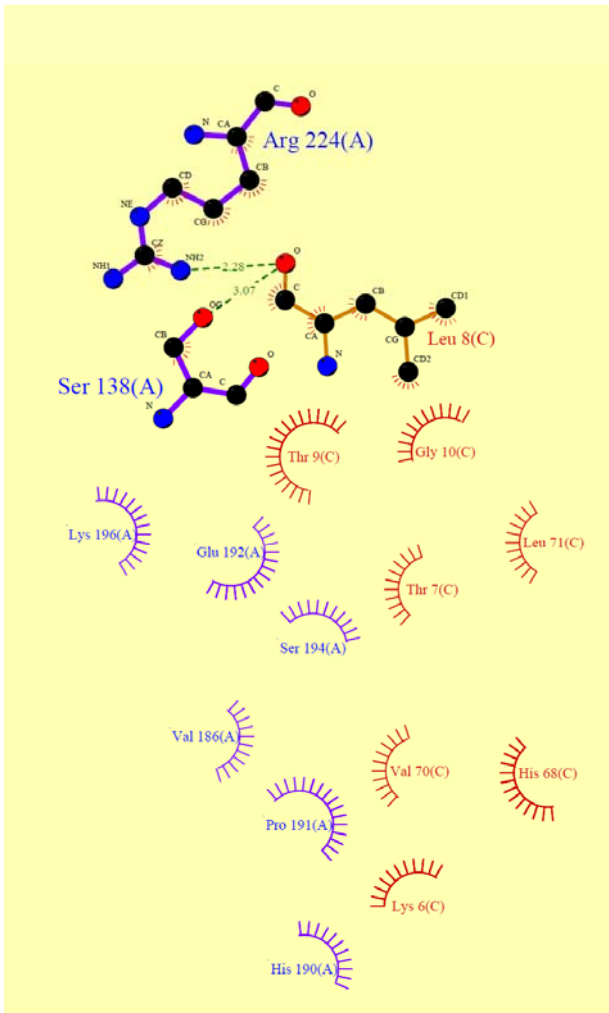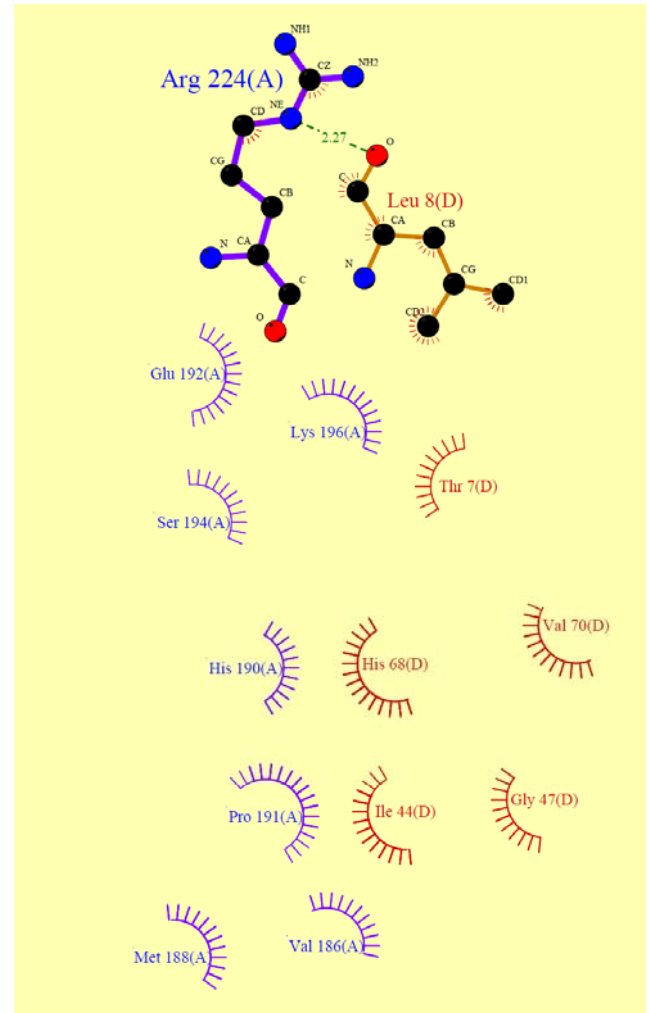

**Key**

- Residues of first surface
- Residues of second surface
- Hydrogen bond and its length
- ⌋ Residues involved in hydrophobic contact(s)
- ⌋ Residues involved in hydrophobic contact(s)
- Corresponding atoms involved in hydrophobic contact(s)

Diagrams of the hydrophobic, electrostatic, and hydrogen bonding interactions between ubiquitin and PCNA

- Supplementary Figure 3 -

## SUPPLEMENTARY TABLES

**Supplementary Table 1.** Steady state kinetic parameters of nucleotide incorporation opposite an abasic site by pol  $\eta$ .

| <i>Proteins</i>                  | $V_{max}$<br>( <i>nM/min</i> ) | $K_m$<br>( $\mu M$ ) | $V_{max}/K_m$ | <i>Relative efficiency</i> |
|----------------------------------|--------------------------------|----------------------|---------------|----------------------------|
| Pol $\eta$ alone                 | $0.26 \pm 0.01$                | $22 \pm 5$           | 0.012         | 1.0                        |
| Pol $\eta$ + non-split PCNA      | $0.36 \pm 0.01$                | $12 \pm 2$           | 0.030         | 2.5                        |
| Pol $\eta$ + split PCNA          | $0.21 \pm 0.01$                | $6.6 \pm 2$          | 0.032         | 2.7                        |
| Pol $\eta$ + <sup>Ubi</sup> PCNA | $0.28 \pm 0.01$                | $6.1 \pm 1$          | 0.046         | 3.8                        |
